# Supplementary material for: Quality Differences between Fresh and Dried Buckwheat Noodles Associated with Water Status and Inner Structure
Source: Foods. 2021 Jan 18;10(1):187. doi: 10.3390/foods10010187 (PMC7831939; doi:10.3390/foods10010187)
Supplement: Supplementary file 1 [file foods-10-00187-s001.pdf]

## Supplementary Materials

Table S1: Sensory parameters and standard of the score for buckwheat noodles

Table S2: Relative amount of water in different states/distribution for uncooked FBN and DBN ( $A_{21}$  for tightly bound water (TBW);  $A_{22}$  for softly bound water (SBW);  $A_{23}$  for free water (FW))

Figure S1: CPMG and IR signal of FBN-20% and DBN-20%

**Table S1.** Sensory parameters and standard of the score for buckwheat noodles.

| Sensory parameters<br>(Full score) |                                    | Score                           |                              |                          |
|------------------------------------|------------------------------------|---------------------------------|------------------------------|--------------------------|
| Colour<br>(10)                     | Light colour and bright<br>8-10    | Brown and less bright<br>5-7    | Dark-brown<br>1-4            | -                        |
| Appearance<br>(10)                 | Smooth and irregular<br>shape 8-10 | Less smooth and in shape<br>5-7 | Rough and<br>unshaped<br>1-4 | -                        |
| Hardness<br>(20)                   | Suitable hardness<br>17-20         | Harder or softer<br>12-16       | Over hard or soft1-12        | -                        |
| Elasticity<br>(25)                 | Elastic<br>21-25                   | Poor elastic<br>16-20           | Worse elasticity<br>11-15    | Worst elasticity<br>1-10 |
| Stickiness<br>(20)                 | Non-sticky<br>16-20                | Less sticky<br>11-25            | Sticky<br>6-10               | Very sticky<br>1-5       |
| Smoothness<br>(10)                 | Smooth<br>8-10                     | Less smooth<br>5-7              | Coarse<br>1-4                | -                        |
| Flavour<br>(5)                     | Buckwheat flavour<br>5             | Non-smell<br>3-4                | Smell<br>1-2                 | -                        |

**Table S2.** Relative amount of water in different states/distribution for uncooked FBN and DBN ( $A_{21}$  for tightly bound water (TBW);  $A_{22}$  for softly bound water (SBW);  $A_{23}$  for free water (FW)).

| Noodles | $A_{21}/\%$             | $A_{22}/\%$             | $A_{23}/\%$            |
|---------|-------------------------|-------------------------|------------------------|
| FBN-20% | $18.03 \pm 0.29^{b1}$ B | $81.60 \pm 0.24^{a1}$ A | $0.37 \pm 0.28^{b1}$ B |
| DBN-20% | $93.58 \pm 0.67^{a2}$ A | $3.64 \pm 0.90^{a2}$ B  | $2.78 \pm 0.25^{c2}$ A |
| FBN-50% | $19.63 \pm 1.32^{b1}$ B | $78.27 \pm 1.55^{b1}$ A | $2.10 \pm 0.24^{a1}$ B |
| DBN-50% | $89.86 \pm 0.77^{b2}$ A | $3.66 \pm 0.67^{a2}$ B  | $6.34 \pm 0.23^{b2}$ A |
| FBN-80% | $24.88 \pm 0.12^{a1}$ B | $72.51 \pm 0.14^{c1}$ A | $2.61 \pm 0.07^{a1}$ B |
| DBN-80% | $87.65 \pm 1.43^{c2}$ A | $3.85 \pm 1.12^{a2}$ B  | $8.50 \pm 1.59^{a2}$ A |

\*The a1, b1 and c1 in a column indicate the proportion of TBW, SBW, and FW respectively within FBN-20/50/80 % is significantly different at  $p < 0.05$ ; The a2, b2, and c2 in a column indicate the proportion of TBW, SBW, and FW respectively within DBN-20/50/80 % is significantly different at  $p < 0.05$ ; The A and B of FBN and DBN with the same addition of extruded buckwheat flour indicate significantly different at  $p < 0.05$ .

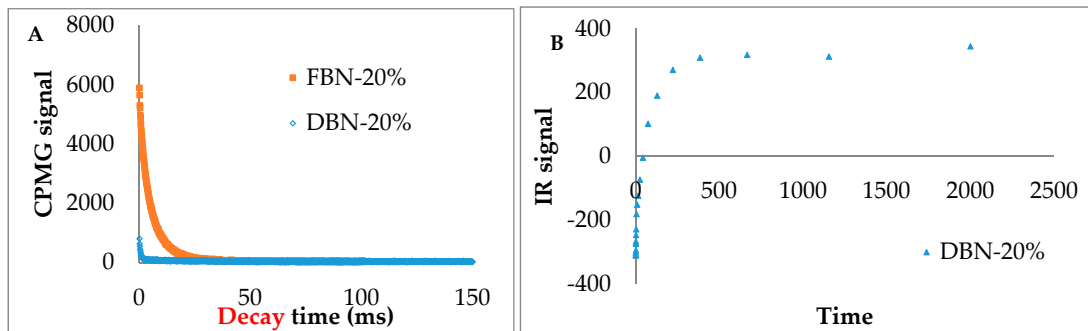

**Figure S1.** CPMG (A) and IR (B) signal of noodles

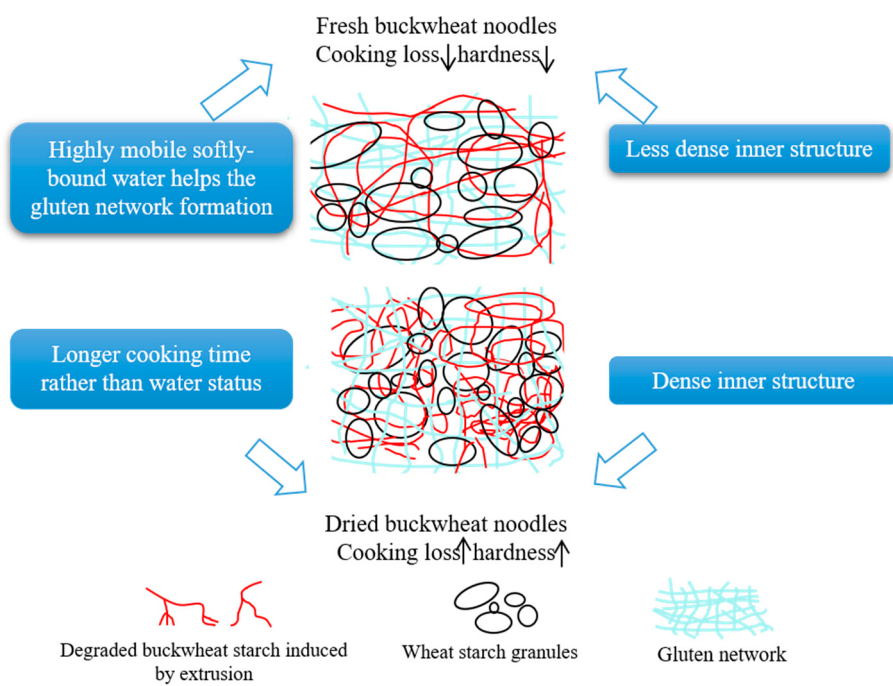

**Figure S2.** Graphical abstract
